# Supplementary material for: Cost-effectiveness analysis of antibiotic prophylaxis versus no antibiotic prophylaxis for acute cholecystectomy
Source: PubMed Central journal article supplement — BMJ Open Gastroenterol. 2023 Aug 10;10(1):e001162. doi: 10.1136/bmjgast-2023-001162 (PMC10423775; doi:10.1136/bmjgast-2023-001162), 2023-08-10
Supplement: bmjgast-2023-001162supp001.pdf [file bmjgast-2023-001162supp001.pdf]

Table S1: Criteria for literature review

| Inclusion                                                                                               | Exclusion                                                                           |
|---------------------------------------------------------------------------------------------------------|-------------------------------------------------------------------------------------|
| Adult patients (18 years and above)                                                                     | Patients with severe cholecystitis (> ASA grade II)                                 |
| Emergency/immediate laparoscopic cholecystectomy                                                        | Elective cholecystectomy                                                            |
| Preoperative antibiotic prophylaxis                                                                     | No comparison between preoperative antibiotic prophylaxis and non-prophylaxis group |
| Postoperative infection or surgical site infection rate reported as an outcome measure                  | No postoperative infectious outcomes reported                                       |
| Randomised controlled trials, non-randomised controlled trials, cohort studies and economic evaluations | Systematic reviews, meta-analyses and editorials                                    |
| Studies published in and after 2018                                                                     | Non-English studies                                                                 |

Table S2: Costing Data

| <b>Description</b>                                          | <b>Cost</b>        | <b>Reference</b>    | <b>Comment</b>                                      |
|-------------------------------------------------------------|--------------------|---------------------|-----------------------------------------------------|
| Non-elective laparoscopic cholecystectomy                   | GBP 3804           | NHS 2021/22 Tariffs | HRG code: GA10K                                     |
| Hepatobiliary and pancreatic surgery outpatient appointment | GBP 115            | NHS 2021/22 Tariffs | HRG code: WF01A                                     |
| <b>Emergency cholecystectomy total</b>                      | <b>GBP 3919</b>    |                     |                                                     |
| <b>Antibiotic prophylaxis</b>                               | <b>GBP 18.39</b>   | BNF 2022            | Single-dose cefazolin 2g administered intravenously |
| <b>Complications</b>                                        |                    |                     |                                                     |
| <b>Superficial wound infection cost</b>                     | <b>GBP 796</b>     | NHS 2021/22 Tariffs | HRG code: WH07G                                     |
| <b>Deep wound infection cost</b>                            | <b>GBP 1234</b>    | NHS 2021/22 Tariffs | HRG code: WH07F                                     |
| Meropenem                                                   | GBP 235.20         | BNF 2022            | 1 g every 8 h: 12 doses                             |
| Metronidazole                                               | GBP 27.36          | BNF 2022            | 500 mg every 12 h: 8 doses                          |
| Ampicillin                                                  | GBP 501.12         | BNF 2022            | 2g every 6 h: 16 doses                              |
| Percutaneous drainage                                       | GBP 772            | NHS 2021/22 Tariffs | HRG code: YF04C                                     |
| <b>Organ/Space infection cost total</b>                     | <b>GBP 1535.68</b> |                     |                                                     |
| <b>Pneumonia cost</b>                                       | <b>GBP 856</b>     | NHS 2021/22 Tariffs | HRG code: DZ11V                                     |
| <b>Urinary tract infection cost</b>                         | <b>GBP 925</b>     | NHS 2021/22 Tariffs | HRG code: LA04S                                     |
| <b>Bacteraemia cost</b>                                     | <b>GBP 2189</b>    | NHS 2021/22 Tariffs | HRG code: WJ06J                                     |

---

---

Table S3: Postoperative infectious complications in intention-to-treat analysis from the PEANUTS II trial

|                                | <b>Single-dose antibiotic prophylaxis (n=226)</b> | <b>No antibiotic prophylaxis (n=231)</b> |
|--------------------------------|---------------------------------------------------|------------------------------------------|
| <b>Surgical-site infection</b> | 12                                                | 28                                       |
| Superficial wound infection    | 6                                                 | 11                                       |
| Deep wound infection           | 0                                                 | 3                                        |
| Organ or space infection       | 6                                                 | 14                                       |
| <b>Distant Infection</b>       | 4                                                 | 1                                        |
| Pneumonia                      | 1                                                 | 1                                        |
| Urinary tract infection        | 1                                                 | 0                                        |
| Bacteraemia                    | 2                                                 | 0                                        |
| <b>Total</b>                   | 16                                                | 29                                       |

Appendix 1: Description of the 'adherence to study protocol' extracted from the PEANUTS II study

*“In 414 patients (90.6 per cent), the treatment received was according to the treatment allocation at randomization. In the prophylaxis group, 204 patients (90.3 per cent) received antibiotic prophylaxis before surgery. Prophylaxis was not administered in 22 patients. In the no-prophylaxis group, the treatment allocation was adhered to in 210 patients (90.9 per cent). However, 21 patients did receive antibiotic prophylaxis, either unintentionally before incision (11 patients) or because of intraoperative observation of severe inflammation, gangrenous gallbladder, or necrotizing cholecystitis (10). Eleven patients, of whom four were allocated to the no-prophylaxis group, received extended antibiotic treatment. In all patients, the indication for postoperative antibiotic treatment was peroperative findings suggestive of severe infection such as perforated gallbladder or empyema, or conversion to open cholecystectomy.”*

Figure S1: Decision Tree for Sensitivity Analysis 1

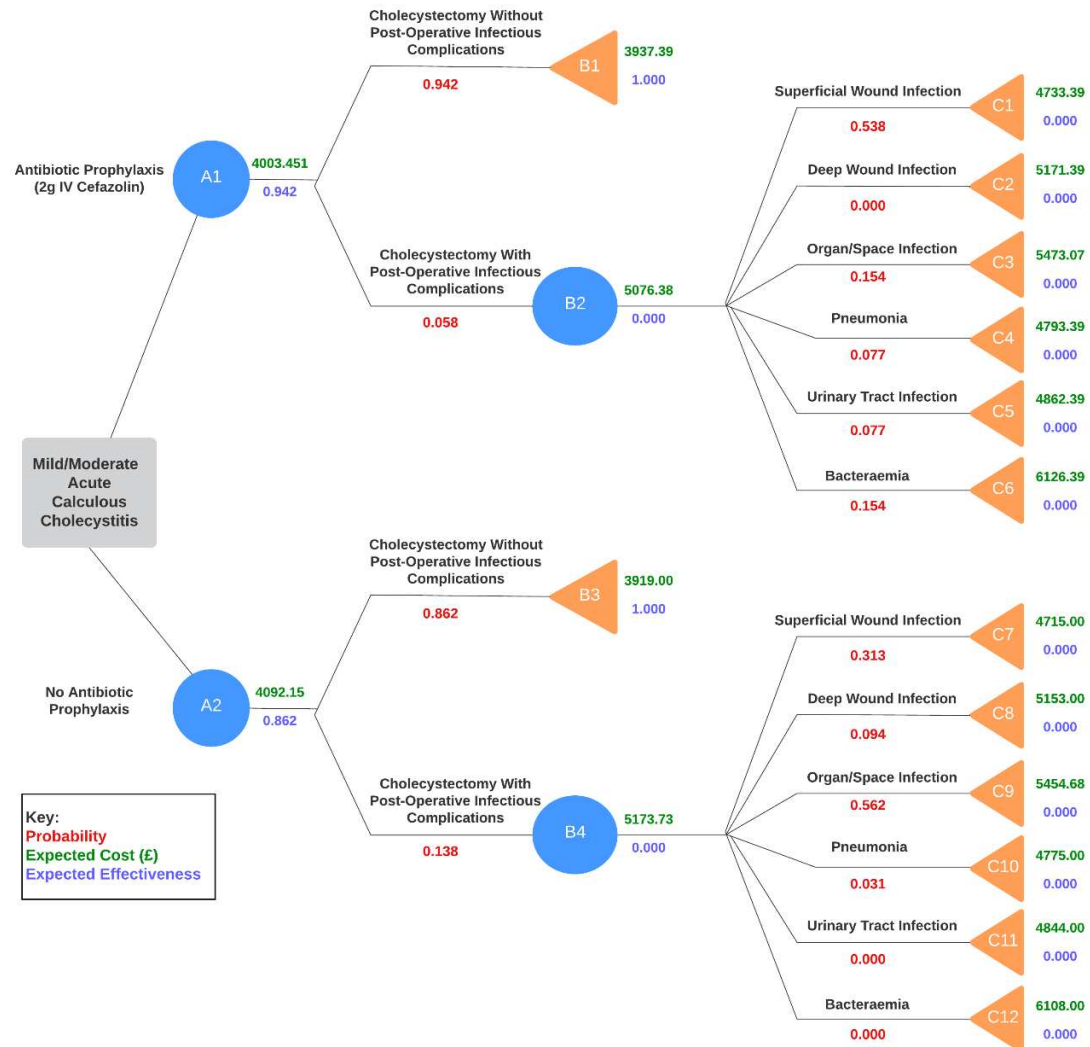

Table S4: Sensitivity 2 Analysis Costings

| <b>Description</b>                      | <b>Cost</b>        | <b>Reference</b>    | <b>Comment</b>             |
|-----------------------------------------|--------------------|---------------------|----------------------------|
| <b>Superficial wound infection cost</b> | <b>GBP 796</b>     | NHS 2021/22 Tariffs | HRG code: WH07G            |
| <b>Deep wound infection cost</b>        | <b>GBP 2852</b>    | NHS 2021/22 Tariffs | HRG code: WH07D            |
| Meropenem                               | GBP 235.20         | BNF 2022            | 1 g every 8 h: 12 doses    |
| Metronidazole                           | GBP 27.36          | BNF 2022            | 500 mg every 12 h: 8 doses |
| Ampicillin                              | GBP 501.12         | BNF 2022            | 2g every 6 h: 16 doses     |
| Percutaneous drainage                   | GBP 1475           | NHS 2021/22 Tariffs | HRG code: YF04B            |
| <b>Organ/Space infection cost total</b> | <b>GBP 2238.68</b> |                     |                            |
| <b>Pneumonia cost</b>                   | <b>GBP 2291</b>    | NHS 2021/22 Tariffs | HRG code: DZ11U            |
| <b>Urinary tract infection cost</b>     | <b>GBP 1570</b>    | NHS 2021/22 Tariffs | HRG code: LA04R            |
| <b>Bacteraemia cost</b>                 | <b>GBP 3258</b>    | NHS 2021/22 Tariffs | HRG code: WJ06H            |

Figure S2: Decision Tree for Sensitivity Analysis 2

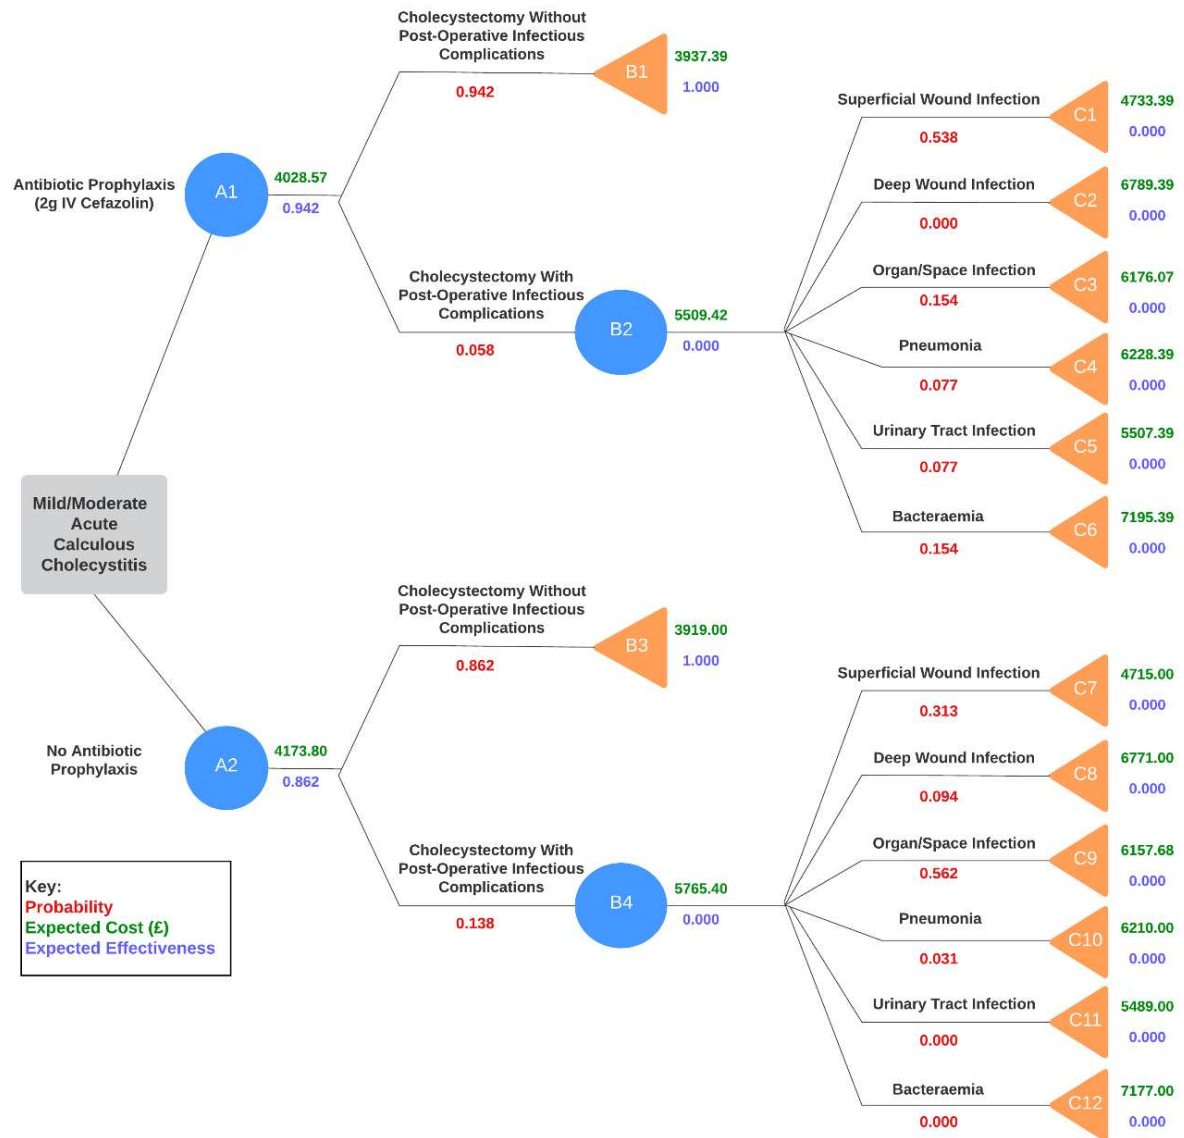

Table S5: Key Assumptions

| <b>Key Assumptions</b> |                                                                                                                                                                                                                                                                                                                                              |
|------------------------|----------------------------------------------------------------------------------------------------------------------------------------------------------------------------------------------------------------------------------------------------------------------------------------------------------------------------------------------|
| 1)                     | All cholecystectomies were modelled as laparoscopic cholecystectomies.                                                                                                                                                                                                                                                                       |
| 2)                     | When considering mild-to-moderate acute cholecystitis, the Dutch and UK populations exhibit similar characteristics.                                                                                                                                                                                                                         |
| 3)                     | Modelling was based on the results from the intention-to-treat analysis of the PEANUTS II trial.                                                                                                                                                                                                                                             |
| 4)                     | The PEANUTS II only reported the number of complications as if they were mutually exclusive. We therefore assume that the cost of treating these complications is independent of other complications.                                                                                                                                        |
| 5)                     | Mortality and non-infectious complications were not modelled.                                                                                                                                                                                                                                                                                |
| 6)                     | The chosen HRG codes and antibiotic regimens represent the least complex form of disease for both treatments.                                                                                                                                                                                                                                |
| 7)                     | All postoperative infectious complications were treated during an inpatient hospital stay and generally within the trim point given by their corresponding HRG code (from NHS national tariffs). The PEANUTS II trial reports a median length of stay of 1 day (range 0–45 days in prophylaxis group and 0–21 days in no-prophylaxis group). |
